# Supplementary material
Source: publisher figshare collection journal article supplement (https://tandf.figshare.com/ndownloader/files/13729565)
Supplement: Supplementary file 1 [file 13729565]

**Supplement 1. Specimens documenting the new record of *Thymus jankae* from Ukraine (* – specimens sampled for morphological study; **– voucher specimen used for karyological study).**

**UKRAINE. Transcarpathian region,** Vynohradiv town, Mt. Chorna Hora: southern stony slopes, thickets, 17 July 1967, *V. Chopyk, O. Dubovyk s.n.* (KW No. 008970, 008971 and two sheets without numbers); thermophilic rock communities on southern slope, 22 July 1986, *O.O. Kagalo 14669* (LWKS No. 031071); on rocks of Chorna Hora eastern slope, 14 July 2006, *O. Kagalo, O. Andreyeva, K. Doroshenko 25082* (LWKS); near Chorna Hora top from southern side, glades with steppe communities, 48°08.245'N, 23°04.526'E, 261 m a.s.l., 15 July 2006, *O. Kagalo, O. Andreyeva, K. Doroshenko 25101* (LWKS No. 031060, 031061*****); foot of southern macroslope, among grasses and stones, 48°08'09.2''N, 23°04'26.7''E, 196 m a.s.l., 18 June 2013, *V.O. Nachychko* *VN 578* (KW)*; southern macroslope, rocks, among stones, 48°08'16.9''N, 23°04'35.9''E, 318 m a.s.l., 18 June 2013, *V.O. Nachychko* *VN 580* (KW)*; in the shade of shrubs at the mountain foot, 48°08'11.5''N, 23°04'27.2''E, 213 m a.s.l., 06 June 2014, *V.O. Nachychko* *VN 826* (KW)*; southern macroslope, among grasses, 48°08'14.3''N, 23°04'32.0''E, 272 m a.s.l., 06 June 2014, *V.O. Nachychko* *VN* *830* (KW)*; at the edge of a rock, 48°08'17.1''N, 23°04'35.8''E, 312 m a.s.l., 06 June 2014, *V.O. Nachychko* *VN* *831* (KW)*; steppe meadow in a forest, among grasses, 48°08'20.9''N, 23°04'46.6''E, 317 m a.s.l., 06 June 2014, *V.O. Nachychko* *VN* *833* (KW)*; southern macroslope, at the edge of a rock, 48°08'17.2''N, 23°04'35.8''E, 318 m a.s.l., 07 June 2014, *V.O. Nachychko* *VN 838* (KW)*, **; southern macroslope, in thick grass, 48°08'17.2''N, 23°04'35.8''E, 318 m a.s.l., 07 June 2014, *V.O. Nachychko* *VN* *839* (KW)*; among grasses, 48°08'17.4''N, 23°04'37.6''E, 318 m a.s.l., 07 June 2014, *V.O. Nachychko* *VN* *840* (KW)*; foot of southern macroslope, herbaceous plant community surrounded with bushes, 48°08'10.0''N, 23°04'27.7''E, 209 m a.s.l., 09 June 2018, *V.O. Nachychko* *VN 1307* (KW)*; top of an abandoned granite quarry, pioneer community on a rocky ledge, 48°08'14.8''N, 23°04'26.0''E, 252 m a.s.l., 09 June 2018, *V.O. Nachychko* *VN 1308* (KW)*; top of an abandoned granite quarry, pioneer community on a rocky ledge, 48°08'14.8''N, 23°04'26.0''E, 252 m a.s.l., 09 June 2018, *V.O. Nachychko* *VN 1310* (KW)*; southern microslope, among grasses, 48°08'14.6''N, 23°04'31.4''E, 256 m a.s.l., 09 June 2018, *V.O. Nachychko* *VN 1314* (KW)*; southeastern macroslope, in thick grass, 48°08'17.4''N, 23°04'37.1''E, 312 m a.s.l., 09 June 2018, *V.O. Nachychko* *VN 1315* (KW)*; southeastern macroslope, in thick grass, 48°08'17.4''N, 23°04'37.1''E, 312 m a.s.l., 09 June 2018, *V.O. Nachychko* *VN 1316* (KW)*; southeastern macroslope, among grasses, 48°08'17.4''N, 23°04'35.6''E, 318 m a.s.l., 09 June 2018, *V.O. Nachychko* *VN 1317* (KW)*; southern macroslope, on a rock outcrop, 48°08'17.6''N, 23°04'32.5''E, 302 m a.s.l., 09 June 2018, *V.O. Nachychko* *VN 1318* (KW)*; southern macroslope, in thick grass, 48°08'17.6''N, 23°04'32.5''E, 302 m a.s.l., 09 June 2018, *V.O. Nachychko* *VN 1319* (KW)*; southern macroslope, on a rock outcrop, 48°08'17.0''N, 23°04'32.3''E, 293 m a.s.l., 09 June 2018, *V.O. Nachychko* *VN 1321* (KW)*; southern macroslope, on a rock outcrop, 48°08'15.6''N, 23°04'33.1''E, 284 m a.s.l., 09 June 2018, *V.O. Nachychko* *VN 1322* (KW)*; southern macroslope, among grasses, 48°08'15.5''N, 23°04'32.9''E, 275 m a.s.l., 09 June 2018, *V.O. Nachychko* *VN 1323* (KW)*; southern macroslope, among grasses, 48°08'15.5''N, 23°04'32.9''E, 275 m a.s.l., 09 June 2018, *V.O. Nachychko* *VN 1324* (KW)*; southern macroslope, among grasses, 48°08'15.6''N, 23°04'33.4''E, 277 m a.s.l., 09 June 2018, *V.O. Nachychko* *VN 1325. Female individual* (KW); southern macroslope, among grasses, 48°08'15.6''N, 23°04'33.4''E, 277 m a.s.l., 09 June 2018, *V.O. Nachychko* *VN 1326* (KW)*; southern macroslope, steppe community, among grasses, 48°08'14.5''N, 23°04'31.5''E, 252 m a.s.l., 09 June 2018, *V.O. Nachychko* *VN 1327* (KW)*; southern macroslope, steppe community, among grasses, 48°08'14.5''N, 23°04'31.5''E, 252 m a.s.l., 09 June 2018, *V.O. Nachychko* *VN 1328* (KW)*; southern macroslope, in a shade of a stone, 48°08'14.2''N, 23°04'32.2''E, 253 m a.s.l., 09 June 2018, *V.O. Nachychko* *VN 1329* (KW)*; southern macroslope, on a rock outcrop, 48°08'14.3''N, 23°04'33.2''E, 257 m a.s.l., 09 June 2018, *V.O. Nachychko* *VN 1330* (KW)*; southern macroslope, on a rock outcrop, 48°08'14.3''N, 23°04'33.2''E, 257 m a.s.l., 09 June 2018, *V.O. Nachychko* *VN 1331* (KW)*; southern macroslope, pioneer community at the edge of a rock, 48°08'17.0''N, 23°04'36.1''E, 320 m a.s.l., 10 June 2018, *V.O. Nachychko* *VN 1332* (KW)*.
